# Supplementary material
Source: PubMed Central journal article supplement (PMC5848493)
Supplement: NIHMS942354-supplement-supplement.pdf [file NIHMS942354-supplement-supplement.pdf]

## Supplementary Online Content

Raifman J, Moscoe E, Austin SB, McConnell M. Difference-in-differences analysis of the association between state same-sex marriage policies and adolescent suicide attempts. *JAMA Pediatr*. Published online February 20, 2017. doi:10.1001/jamapediatrics.2016.4529

**eFigure.** Timeline of State Same-Sex Marriage Policies Prior to 2015

**eTable 1.** Data Collection on Sexual Orientation

**eTable 2.** Timing of Same-Sex Marriage Policies and Data Collection

**eTable 3.** Linear Analysis of Differences in Baseline Trends in Same-Sex Marriage and Non-Same-Sex Marriage States

**eTable 4.** Linear Difference-in-Differences Analysis of Same-Sex Marriage Policies: Changes in High School Student Suicide Attempts in Same-Sex Marriage States Relative to Non-Same-Sex Marriage States

**eTable 5.** Linear Difference-in-Differences Analysis of Same-Sex Marriage Policies: Changes in All High School Student Suicide Attempts in Same-Sex Marriage States Relative to Non-Same-Sex Marriage States With Sexual Orientation Data

**eTable 6.** Robustness Check Linear Difference-in-Differences “Lead” Analysis of Passing Same-Sex Marriage Laws in the Next 1-2 Years: Changes in High School Student Suicide Attempts in Same-Sex Marriage States Relative to Non-Same-Sex Marriage States

**eTable 7.** Robustness Check Linear Difference-in-Differences “Lag” Analysis of Passing Same-Sex Marriage Laws in the Next 1-2 Years: Changes in High School Student Suicide Attempts in Same-Sex Marriage States Relative to Non-Same-Sex Marriage States

**eTable 8.** Robustness Check Difference-in-Differences Analysis of Same-Sex Marriage Policies Excluding Massachusetts

**eTable 9.** Robustness Check Linear Difference-in-Differences Analysis of Same-Sex Marriage: Changes in High School Students Having any Juice or Carrot Consumption in the Past 7 Days, and Never/Rarely Wearing Seatbelts in Same-Sex Marriage States Relative to Non-Same-Sex Marriage States

This supplementary material has been provided by the authors to give readers additional information about their work.

**eFigure.** Timeline of State Same-Sex Marriage Policies Prior to 2015

|             |      |                       |      |             |           |             |      |             |           |             |           |             |           |             |           |             |
|-------------|------|-----------------------|------|-------------|-----------|-------------|------|-------------|-----------|-------------|-----------|-------------|-----------|-------------|-----------|-------------|
|             |      |                       |      |             |           |             |      |             |           |             |           |             |           |             |           | <b>AK</b>   |
|             |      |                       |      |             |           |             |      |             |           |             |           |             |           |             |           | <b>AZ</b>   |
|             |      | <b>Legal decision</b> |      |             |           |             |      |             |           |             |           |             |           |             |           | <b>CO</b>   |
|             |      | <b>Legislation</b>    |      |             |           |             |      |             |           |             |           |             |           |             |           | <b>ID</b>   |
|             |      |                       |      |             |           |             |      |             |           |             |           |             |           |             |           | <b>IN</b>   |
|             |      |                       |      |             |           |             |      |             |           |             |           |             |           |             |           | <b>IL</b>   |
|             |      |                       |      |             |           |             |      |             |           |             |           |             |           |             |           | <b>KS</b>   |
|             |      |                       |      |             |           |             |      |             |           |             |           |             |           |             |           | <b>MT</b>   |
|             |      |                       |      |             |           |             |      |             |           |             |           |             |           |             |           | <b>NC</b>   |
|             |      |                       |      |             |           |             |      |             |           |             |           |             |           |             |           | <b>NV</b>   |
|             |      |                       |      |             |           |             |      |             |           |             |           |             |           |             |           | <b>OK</b>   |
|             |      |                       |      |             |           |             |      |             |           |             |           |             |           |             | <b>CA</b> | <b>OR</b>   |
|             |      |                       |      |             |           |             |      |             |           |             |           |             |           |             | <b>DE</b> | <b>PA</b>   |
|             |      |                       |      |             |           |             |      |             |           |             |           |             |           |             | <b>HI</b> | <b>SC</b>   |
|             |      |                       |      |             |           |             |      |             |           |             |           |             |           |             | <b>MD</b> | <b>UT</b>   |
|             |      |                       |      |             |           |             |      |             |           |             |           |             |           |             | <b>MN</b> | <b>VA</b>   |
|             |      |                       |      |             |           |             |      |             |           |             |           |             |           |             | <b>NJ</b> | <b>WV</b>   |
|             |      |                       |      |             |           |             |      |             | <b>IA</b> |             |           |             | <b>ME</b> | <b>NM</b>   | <b>WI</b> |             |
|             |      |                       |      |             | <b>MA</b> |             |      | <b>CT</b>   | <b>VT</b> | <b>NH</b>   | <b>NY</b> | <b>WA</b>   | <b>RI</b> | <b>WY</b>   |           |             |
| <b>1999</b> | 2000 | <b>2001</b>           | 2002 | <b>2003</b> | 2004      | <b>2005</b> | 2006 | <b>2007</b> | 2008      | <b>2009</b> | 2010      | <b>2011</b> | 2012      | <b>2013</b> | 2014      | <b>2015</b> |

Notes: Data collection occurred during January-May in odd years (bolded). States were coded as having same-sex marriage if same-sex marriage was legal during the full period of data collection. States that passed same sex-marriage during odd years were not coded as having same-sex marriage until the following odd year. Two states enacted same-sex marriage policies during the data collection period (Iowa in February 2009 and Delaware in April 2013) and were coded as not having same-sex marriage until the following data collection cycle (2013 for Iowa and 2015 for Delaware). States in gray did not participate in the YRBSS.

**eTable 1.** Data Collection on Sexual Orientation

| State        | 1995 | 1997 | 1999 | 2001 | 2003 | 2005 | 2007 | 2009 | 2011 | 2013 | 2015 |
|--------------|------|------|------|------|------|------|------|------|------|------|------|
| AR           |      |      |      |      |      |      |      |      |      |      | X    |
| AZ           |      |      |      |      |      |      |      |      |      | X    | X    |
| CA           |      |      |      |      |      |      |      |      |      |      | X    |
| CT           |      |      |      |      |      |      |      |      | X    | X    | X    |
| DE           |      |      |      |      | X    | X    | X    | X    | X    | X    | X    |
| FL           |      |      |      |      |      |      |      |      |      |      | X    |
| HI           |      |      |      |      |      |      |      |      | X    | X    | X    |
| IL           |      |      |      |      |      |      |      | X    | X    | X    | X    |
| IN           |      |      |      |      |      |      |      |      |      |      | X    |
| KY           |      |      |      |      |      |      |      |      |      |      | X    |
| MA           |      |      | X    | X    | X    | X    | X    | X    | X    | X    | X    |
| MD           |      |      |      |      |      |      |      |      |      | X    | X    |
| ME           |      |      |      |      |      |      | X    | X    | X    | X    | X    |
| MI           |      |      |      |      |      |      |      |      |      | X    | X    |
| NC           |      |      |      |      |      |      |      |      |      | X    | X    |
| ND           |      |      |      |      |      |      |      | X    | X    | X    | X    |
| NH           |      |      |      |      |      |      |      |      |      | X    |      |
| NM           |      |      |      |      |      |      |      |      |      | X    | X    |
| NV           |      |      |      |      |      |      |      |      |      |      | X    |
| NY           |      |      |      |      |      |      |      |      |      |      | X    |
| OK           |      |      |      |      |      |      |      |      |      |      | X    |
| PA           |      |      |      |      |      |      |      |      |      |      | X    |
| RI           |      |      |      |      |      |      | X    | X    | X    | X    | X    |
| VT           |      |      |      |      |      | X    | X    | X    | X    |      | X    |
| WI           |      |      |      |      |      |      |      |      | X    | X    |      |
| WV           |      |      |      |      |      |      |      |      |      |      | X    |
| WY           |      |      |      |      |      |      |      |      |      |      | X    |
| <b>TOTAL</b> | 0    | 0    | 1    | 1    | 2    | 3    | 5    | 7    | 10   | 15   | 25   |

**eTable 2.** Timing of Same-Sex Marriage Policies and Data Collection

| State         |    | Date of legalization | Form of legalization | First year of analysis coded as enacting same sex marriage | Number of survey rounds of data asking about suicide attempts and with weighted data | Number of survey rounds asking about sexual identity and with weighted data |
|---------------|----|----------------------|----------------------|------------------------------------------------------------|--------------------------------------------------------------------------------------|-----------------------------------------------------------------------------|
| Alabama       | AL | 6/26/15              | Court                | None                                                       | 7                                                                                    | 0                                                                           |
| Alaska        | AK | 10/12/14             | Court                | 2015                                                       | 7                                                                                    | 0                                                                           |
| Arizona       | AZ | 10/17/14             | Court                | 2015                                                       | 7                                                                                    | 2                                                                           |
| Arkansas      | AR | 6/26/15              | Court                | None                                                       | 8                                                                                    | 1                                                                           |
| California    | CA | 6/26/13              | Court***             | 2015                                                       | 1                                                                                    | 1                                                                           |
| Colorado      | CO | 10/17/14             | Court                | 2015                                                       | 3                                                                                    | 0                                                                           |
| Connecticut   | CT | 11/12/08             | Court                | 2009                                                       | 6                                                                                    | 3                                                                           |
| Delaware      | DE | 7/1/13               | Legislation          | 2015                                                       | 7                                                                                    | 7                                                                           |
| Florida       | FL | 1/6/15               | Court                | None                                                       | 8                                                                                    | 1                                                                           |
| Georgia       | GA | 6/26/15              | Court                | None                                                       | 6                                                                                    | 0                                                                           |
| Hawaii        | HI | 12/2/13              | Legislation          | 2015                                                       | 7                                                                                    | 3                                                                           |
| Idaho         | ID | 10/15/14             | Court                | 2015                                                       | 8                                                                                    | 0                                                                           |
| Illinois      | IL | 11/20/13             | Legislation          | 2015                                                       | 5                                                                                    | 4                                                                           |
| Indiana       | IN | 10/6/14              | Court                | 2015                                                       | 5                                                                                    | 1                                                                           |
| Iowa          | IA | 4/3/09               | Court                | 2011                                                       | 3                                                                                    | 0                                                                           |
| Kansas        | KS | 6/26/15              | Court                | None                                                       | 5                                                                                    | 0                                                                           |
| Kentucky      | KY | 6/26/15              | Court                | None                                                       | 7                                                                                    | 1                                                                           |
| Louisiana     | LA | 6/26/15              | Court                | None                                                       | 4                                                                                    | 0                                                                           |
| Maine         | ME | 12/29/12             | Legislation*^        | 2013                                                       | 8                                                                                    | 5                                                                           |
| Maryland      | MD | 1/1/13               | Legislation*         | 2015                                                       | 4                                                                                    | 2                                                                           |
| Massachusetts | MA | 5/7/04               | Court                | 2005                                                       | 9                                                                                    | 9                                                                           |
| Michigan      | MI | 6/26/15              | Court**              | None                                                       | 9                                                                                    | 2                                                                           |
| Minnesota     | MN | 7/1/13               | Legislation          | Does not participate in YRBSS                              |                                                                                      |                                                                             |
| Mississippi   | MS | 6/26/15              | Court                | None                                                       | 8                                                                                    | 0                                                                           |
| Missouri      | MO | 6/26/15              | Court                | None                                                       | 8                                                                                    | 0                                                                           |
| Montana       | MT | 11/9/14              | Court                | 2015                                                       | 9                                                                                    | 0                                                                           |
| Nebraska      | NE | 6/26/15              | Court                | None                                                       | 6                                                                                    | 0                                                                           |
| Nevada        | NV | 10/9/14              | Court                | 2015                                                       | 8                                                                                    | 1                                                                           |
| New Hampshire | NH | 1/1/10               | Legislation          | 2011                                                       | 7                                                                                    | 1                                                                           |
| New Jersey    | NJ | 10/22/13             | Court                | 2015                                                       | 3                                                                                    | 0                                                                           |

| State                                                                                                                                                                                                  |    | Date of legalization | Form of legalization | First year of analysis coded as enacting same sex marriage | Number of survey rounds of data asking about suicide attempts and with weighted data | Number of survey rounds asking about sexual identity and with weighted data |
|--------------------------------------------------------------------------------------------------------------------------------------------------------------------------------------------------------|----|----------------------|----------------------|------------------------------------------------------------|--------------------------------------------------------------------------------------|-----------------------------------------------------------------------------|
| New Mexico                                                                                                                                                                                             | NM | 12/19/13             | Court                | 2015                                                       | 6                                                                                    | 2                                                                           |
| New York                                                                                                                                                                                               | NY | 7/24/11              | Legislation          | 2013                                                       | 8                                                                                    | 1                                                                           |
| North Carolina                                                                                                                                                                                         | NC | 10/10/14             | Court                | 2015                                                       | 5                                                                                    | 0                                                                           |
| North Dakota                                                                                                                                                                                           | ND | 6/26/15              | Court                | None                                                       | 9                                                                                    | 4                                                                           |
| Ohio                                                                                                                                                                                                   | OH | 6/26/15              | Court                | None                                                       | 3                                                                                    | 0                                                                           |
| Oklahoma                                                                                                                                                                                               | OK | 10/6/14              | Court                | 2015                                                       | 6                                                                                    | 1                                                                           |
| Oregon                                                                                                                                                                                                 | OR | 5/19/14              | Court                | Does not participate in YRBSS                              |                                                                                      |                                                                             |
| Pennsylvania                                                                                                                                                                                           | PA | 5/20/14              | Court                | 2015                                                       | 2                                                                                    | 1                                                                           |
| Rhode Island                                                                                                                                                                                           | RI | 7/1/11               | Legislation          | 2013                                                       | 8                                                                                    | 5                                                                           |
| South Carolina                                                                                                                                                                                         | SC | 11/12/14             | Court                | 2015                                                       | 8                                                                                    | 0                                                                           |
| South Dakota                                                                                                                                                                                           | SD | 6/26/15              | Court                | None                                                       | 9                                                                                    | 0                                                                           |
| Tennessee                                                                                                                                                                                              | TN | 6/26/15              | Court                | None                                                       | 7                                                                                    | 0                                                                           |
| Texas                                                                                                                                                                                                  | TX | 6/26/15              | Court                | None                                                       | 6                                                                                    | 0                                                                           |
| Utah                                                                                                                                                                                                   | UT | 10/6/14              | Court^^              | 2015                                                       | 8                                                                                    | 0                                                                           |
| Vermont                                                                                                                                                                                                | VT | 9/1/09               | Legislation          | 2011                                                       | 8                                                                                    | 5                                                                           |
| Virginia                                                                                                                                                                                               | VA | 10/6/14              | Court                | 2015                                                       | 3                                                                                    | 0                                                                           |
| Washington                                                                                                                                                                                             | WA | 12/6/12              | Legislation*         | Does not participate in YRBSS                              |                                                                                      |                                                                             |
| West Virginia                                                                                                                                                                                          | WV | 10/9/14              | Court                | 2015                                                       | 8                                                                                    | 1                                                                           |
| Wisconsin                                                                                                                                                                                              | WI | 10/6/14              | Court                | 2015                                                       | 8                                                                                    | 2                                                                           |
| Wyoming                                                                                                                                                                                                | WY | 10/17/14             | Court                | 2015                                                       | 9                                                                                    | 1                                                                           |
| ^Previous legislation legalized same sex marriage that was later repealed by voters.                                                                                                                   |    |                      |                      |                                                            |                                                                                      |                                                                             |
| *Legislation was affirmed by voter ballot referendum.                                                                                                                                                  |    |                      |                      |                                                            |                                                                                      |                                                                             |
| **Same sex marriages occurred March 22, 2014 after a US district court ruling that was later overturned.                                                                                               |    |                      |                      |                                                            |                                                                                      |                                                                             |
| ^^Same sex marriages occurred between December 23, 2013 and January 2, 2014 after a US district court ruling. Marriages were halted after a lawsuit was filed.                                         |    |                      |                      |                                                            |                                                                                      |                                                                             |
| ***Same sex marriages occurred between June 16, 2008 and November 5, 2008 after a California Supreme court ruling. Marriages were halted after a voter referendum that made same sex marriage illegal. |    |                      |                      |                                                            |                                                                                      |                                                                             |

**eTable 3.** Linear Analysis of Differences in Baseline Trends in Same-Sex Marriage and Non-Same-Sex Marriage States

|                              | <b>Suicide attempts (N=615,490)</b> |                 |
|------------------------------|-------------------------------------|-----------------|
|                              | <b>Point estimate</b>               | <b>95% CI</b>   |
| Same-sex marriage state*year | <0.001                              | -0.001 - 0.001  |
| Year                         | <0.001                              | -0.001 - <0.001 |
| Same-sex marriage state      | 0.010                               | -0.004 - 0.024  |
| Age                          |                                     |                 |
| 14 and younger               | Ref                                 |                 |
| 15                           | -0.002                              | -0.006 - 0.002  |
| 16                           | -0.004*                             | -0.008 - <0.001 |
| 17                           | -0.019***                           | -0.023 - -0.015 |
| 18 and older                 | -0.016***                           | -0.020 - -0.011 |
| Race/ethnicity               |                                     |                 |
| White                        | Ref                                 |                 |
| Black                        | 0.027***                            | 0.023 - 0.031   |
| Hispanic/Latino              | 0.042***                            | 0.038 - 0.047   |
| Other race/ethnicity         | 0.036***                            | 0.031 - 0.040   |
| Sex                          |                                     |                 |
| Male                         | Ref                                 |                 |
| Female                       | 0.035***                            | 0.033 - 0.037   |
| Unemployment rate            | 0.001*                              | <0.001 - 0.001  |
| Anti-discrimination policy   | -0.001                              | -0.007 - 0.005  |

Notes: Linear regression models include controls for state and year. We tested quadratic terms to confirm that baseline trends in suicide attempts were linear. \*<0.1, \*\*<0.05, \*\*\*<0.01

**eTable 4.** Linear Difference-in-Differences Analysis of Same-Sex Marriage Policies: Changes in High School Student Suicide Attempts in Same-Sex Marriage States Relative to Non-Same-Sex Marriage States

|                                  | <b>Suicide attempts (N=762,678)</b> |                 |
|----------------------------------|-------------------------------------|-----------------|
|                                  | <b>Point estimate</b>               | <b>95% CI</b>   |
| Same-sex marriage policy enacted | -0.006**                            | -0.012 - -0.001 |
| Same-sex marriage state          | 0.005                               | -0.006 - 0.017  |
| Age                              |                                     |                 |
| 14 and younger                   | Ref                                 |                 |
| 15                               | -0.001                              | -0.005 - 0.003  |
| 16                               | -0.003                              | -0.007 - 0.001  |
| 17                               | -0.018***                           | -0.022 - -0.014 |
| 18 and older                     | -0.015***                           | -0.019 - -0.010 |
| Race/ethnicity                   |                                     |                 |
| White                            | Ref                                 |                 |
| Black                            | 0.029***                            | 0.026 - 0.033   |
| Hispanic/Latino                  | 0.043***                            | 0.039 - 0.047   |
| Other race/ethnicity             | 0.032***                            | 0.028 - 0.037   |
| Sex                              |                                     |                 |
| Male                             | Ref                                 |                 |
| Female                           | 0.036***                            | 0.033 - 0.038   |
| Unemployment rate                | <0.001                              | -0.002 - 0.002  |
| Anti-discrimination policy       | -0.003                              | -0.009 - 0.003  |

Notes: Linear regression models include controls for state and year. \*<0.1, \*\*<0.05, \*\*\*<0.01

**eTable 5.** Linear Difference-in-Differences Analysis of Same-Sex Marriage Policies: Changes in All High School Student Suicide Attempts in Same-Sex Marriage States Relative to Non-Same-Sex Marriage States With Sexual Orientation Data

|                                            | <b>All student suicide attempts in states that collected data on sexual orientation (N=231,413)</b> |                 |
|--------------------------------------------|-----------------------------------------------------------------------------------------------------|-----------------|
|                                            | <b>Point estimate</b>                                                                               | <b>95% CI</b>   |
| Same-sex marriage policy enacted           | 0.003                                                                                               | -0.009 - 0.014  |
| Same-sex marriage policy * sexual minority | -0.040***                                                                                           | -0.069 - -0.012 |
| Same-sex marriage state                    | <0.001                                                                                              | -0.024 - 0.024  |
| Sexual minority                            | 0.206***                                                                                            | 0.187 - 0.224   |
| Age                                        |                                                                                                     |                 |
| 14 and younger                             | Ref                                                                                                 |                 |
| 15                                         | 0.003                                                                                               | -0.005 - 0.012  |
| 16                                         | -0.003                                                                                              | -0.012 - 0.006  |
| 17                                         | -0.014***                                                                                           | -0.023 - -0.005 |
| 18 and older                               | -0.016***                                                                                           | -0.025 - -0.008 |
| Race/ethnicity                             |                                                                                                     |                 |
| White                                      | Ref                                                                                                 |                 |
| Black                                      | 0.034***                                                                                            | 0.026 - 0.043   |
| Hispanic/Latino                            | 0.044***                                                                                            | 0.034 - 0.054   |
| Other race/ethnicity                       | 0.019***                                                                                            | 0.011 - 0.027   |
| Sex                                        |                                                                                                     |                 |
| Male                                       | Ref                                                                                                 |                 |
| Female                                     | 0.022***                                                                                            | 0.017 - 0.028   |
| Unemployment rate                          | 0.007**                                                                                             | <0.001 - 0.014  |
| Anti-discrimination policy                 | -0.009                                                                                              | -0.022 - 0.004  |

Notes: Linear regression models include controls for state and year. \*<0.1, \*\*<0.05, \*\*\*<0.01



**eTable 6.** Robustness Check Linear Difference-in-Differences “Lead” Analysis of Passing Same-Sex Marriage Laws in the Next 1-2 Years: Changes in High School Student Suicide Attempts in Same-Sex Marriage States Relative to Non-Same-Sex Marriage States

|                                                  | Suicide attempts among all students in all states (N=765,039) |                 | Suicide attempts among all students in states that collected sexual orientation data (N=231,413) |                 |
|--------------------------------------------------|---------------------------------------------------------------|-----------------|--------------------------------------------------------------------------------------------------|-----------------|
|                                                  | Point estimate                                                | 95% CI          | Point estimate                                                                                   | 95% CI          |
| Lead: Enacting same-sex marriage in next 2 years | <0.001                                                        | -0.006 - 0.006  | 0.014**                                                                                          | 0.002 - 0.026   |
| Lead*sexual minority                             |                                                               |                 | -0.022                                                                                           | -0.056 - 0.011  |
| Sexual minority                                  |                                                               |                 | 0.200***                                                                                         | 0.171 - 0.230   |
| Same-sex marriage state                          | 0.009                                                         | -0.005 - 0.024  | <0.001                                                                                           | -0.022 - 0.022  |
| Age                                              |                                                               |                 |                                                                                                  |                 |
| 14 and younger                                   | Ref                                                           |                 | Ref                                                                                              |                 |
| 15                                               | -0.002                                                        | -0.006 - 0.002  | -0.002                                                                                           | -0.006 - 0.002  |
| 16                                               | -0.004**                                                      | -0.008 - <0.001 | -0.004**                                                                                         | -0.008 - <0.001 |
| 17                                               | -0.019***                                                     | -0.023 - -0.015 | -0.019***                                                                                        | -0.023 - -0.015 |
| 18 and older                                     | -0.016***                                                     | -0.020 - -0.011 | -0.016***                                                                                        | -0.020 - -0.011 |
| Race/ethnicity                                   |                                                               |                 |                                                                                                  |                 |
| White                                            | Ref                                                           |                 | Ref                                                                                              |                 |
| Black                                            | 0.030***                                                      | 0.026 - 0.033   | 0.030***                                                                                         | 0.026 - 0.033   |
| Hispanic/Latino                                  | 0.044***                                                      | 0.039 - 0.048   | 0.044***                                                                                         | 0.039 - 0.048   |
| Other race/ethnicity                             | 0.034***                                                      | 0.030 - 0.038   | 0.034***                                                                                         | 0.030 - 0.038   |
| Sex                                              |                                                               |                 |                                                                                                  |                 |
| Male                                             | Ref                                                           |                 | Ref                                                                                              |                 |
| Female                                           | 0.035***                                                      | 0.033 - 0.037   | 0.035***                                                                                         | 0.033 - 0.037   |
| Unemployment rate                                | <0.001                                                        | -0.002 - 0.002  | <0.001                                                                                           | -0.002 - 0.002  |
| Anti-discrimination policy                       | -0.003                                                        | -0.009 - 0.003  | -0.003                                                                                           | -0.009 - 0.003  |

Notes: Linear regression models include controls for state and year. “Lead” variables indicating states would later pass same-sex marriage policies were not associated with reduced adolescent suicide attempts in the full population or among sexual minority youth, indicating that the results we find are not due to differences in suicide attempts in same-sex marriage states relative to non-same-sex marriage states that occurred prior to same-sex marriage enactment. \*<0.1, \*\*<0.05, \*\*\*<0.01

**eTable 7.** Robustness Check Linear Difference-in-Differences “Lag” Analysis of Passing Same-Sex Marriage Laws in the Next 1-2 Years: Changes in High School Student Suicide Attempts in Same-Sex Marriage States Relative to Non-Same-Sex Marriage States

|                                                | Suicide attempts among all students in all states (N=765,039) |                 | Suicide attempts among all students in states that collected sexual orientation data (N=231,413) |                 |
|------------------------------------------------|---------------------------------------------------------------|-----------------|--------------------------------------------------------------------------------------------------|-----------------|
|                                                | Point estimate                                                | 95% CI          | Point estimate                                                                                   | 95% CI          |
| Lag: Enacted same-sex marriage in past 2 years | -0.006**                                                      | -0.011 - <0.001 | 0.003                                                                                            | -0.009 - 0.014  |
| Lag*sexual minority                            |                                                               |                 | -0.040***                                                                                        | -0.069 - -0.012 |
| Sexual minority                                |                                                               |                 | 0.206***                                                                                         | 0.187 - 0.224   |
| Same-sex marriage state                        | 0.010                                                         | -0.004 - 0.024  | <0.001                                                                                           | -0.024 - 0.024  |
| Age                                            |                                                               |                 |                                                                                                  |                 |
| 14 and younger                                 | Ref                                                           |                 |                                                                                                  |                 |
| 15                                             | -0.002                                                        | -0.006 - 0.002  | -0.002                                                                                           | -0.006 - 0.002  |
| 16                                             | -0.004**                                                      | -0.008 - <0.001 | -0.004**                                                                                         | -0.008 - <0.001 |
| 17                                             | -0.019***                                                     | -0.023 - -0.015 | -0.019***                                                                                        | -0.023 - -0.015 |
| 18 and older                                   | -0.016***                                                     | -0.020 - -0.011 | -0.016***                                                                                        | -0.020 - -0.011 |
| Race/ethnicity                                 |                                                               |                 |                                                                                                  |                 |
| White                                          | Ref                                                           |                 |                                                                                                  |                 |
| Black                                          | 0.030***                                                      | 0.026 - 0.033   | 0.030***                                                                                         | 0.026 - 0.033   |
| Hispanic/Latino                                | 0.043***                                                      | 0.039 - 0.048   | 0.043***                                                                                         | 0.039 - 0.048   |
| Other race/ethnicity                           | 0.033***                                                      | 0.029 - 0.037   | 0.033***                                                                                         | 0.029 - 0.037   |
| Sex                                            |                                                               |                 |                                                                                                  |                 |
| Male                                           | Ref                                                           |                 |                                                                                                  |                 |
| Female                                         | 0.035***                                                      | 0.033 - 0.037   | 0.035***                                                                                         | 0.033 - 0.037   |
| Unemployment rate                              | <0.001                                                        | -0.002 - 0.002  | <0.001                                                                                           | -0.002 - 0.002  |
| Anti-discrimination policy                     | -0.003                                                        | -0.009 - 0.003  | -0.003                                                                                           | -0.009 - 0.003  |

Notes: Linear regression models include controls for state and year. The estimated relationship between the lagged same-sex marriage variable and adolescent suicide attempts suggests that the relationship between same-sex marriage policies and adolescent suicide attempts persisted following initial implementation. \*<0.1, \*\*<0.05, \*\*\*<0.01

**eTable 8.** Robustness Check Difference-in-Differences Analysis of Same-Sex Marriage Policies Excluding Massachusetts

|                                | Suicide attempts among all adolescents (N=737,063) |                 |                |                 |
|--------------------------------|----------------------------------------------------|-----------------|----------------|-----------------|
|                                | Point estimate                                     | 95% CI          | Point estimate | 95% CI          |
| Equal marriage                 | -0.007**                                           | -0.013 - -0.002 | -0.002         | -0.017 - 0.014  |
| Equal marriage*sexual minority |                                                    |                 | -0.040**       | -0.072 - -0.008 |
| Sexual minority                |                                                    |                 | 0.201***       | 0.181 - 0.221   |
| Same-sex marriage state        | 0.006                                              | -0.008 - 0.020  | 0.003          | -0.023 - 0.029  |
| Age                            |                                                    |                 |                |                 |
| 14 and younger                 | Ref                                                |                 | Ref            |                 |
| 15                             | -0.001                                             | -0.005 - 0.004  | 0.006          | -0.004 - 0.017  |
| 16                             | -0.003*                                            | -0.008 - 0.001  | -0.003         | -0.014 - 0.007  |
| 17                             | -0.018***                                          | -0.022 - -0.014 | -0.015***      | -0.026 - -0.005 |
| 18 and older                   | -0.015***                                          | -0.019 - -0.010 | -0.016***      | -0.026 - -0.006 |
| Race/ethnicity                 |                                                    |                 |                |                 |
| White                          | Ref                                                |                 | Ref            |                 |
| Black                          | 0.029***                                           | 0.025 - 0.033   | 0.037***       | 0.028 - 0.047   |
| Hispanic/Latino                | 0.042***                                           | 0.038 - 0.047   | 0.041***       | 0.028 - 0.054   |
| Other race/ethnicity           | 0.029***                                           | 0.025 - 0.034   | 0.021***       | 0.011 - 0.031   |
| Sex                            |                                                    |                 |                |                 |
| Male                           | Ref                                                |                 | Ref            |                 |
| Female                         | 0.036***                                           | 0.034 - 0.038   | 0.023***       | 0.017 - 0.030   |
| Unemployment rate              | <0.001                                             | -0.001 - 0.001  | 0.006*         | -0.001 - 0.013  |
| Anti-discrimination policy     | -0.001                                             | -0.006 - 0.005  | -0.015**       | -0.030 - -0.000 |

Notes: Linear regression models include controls for state and year. The main effect estimates indicate that the relationship between same-sex marriage policies and adolescent suicide attempts continued to hold when the state of Massachusetts was excluded from the analysis. \*<0.1, \*\*<0.05, \*\*\*<0.01

**eTable 9.** Robustness Check Linear Difference-in-Differences Analysis of Same-Sex Marriage: Changes in High School Students Having any Juice or Carrot Consumption in the Past 7 Days, and Never/Rarely Wearing Seatbelts in Same-Sex Marriage States Relative to Non-Same-Sex Marriage States

|                            | Juice consumption (N=738,032) |                 | Carrot consumption (N=713,804) |                 | Seatbelt use (N=724,359) |                 |
|----------------------------|-------------------------------|-----------------|--------------------------------|-----------------|--------------------------|-----------------|
|                            | Point estimate                | 95% CI          | Point estimate                 | 95% CI          | Point estimate           | 95% CI          |
| Passed same-sex marriage   | 0.007                         | -0.006 - 0.020  | 0.001                          | -0.010 - 0.012  | -0.002                   | -0.006 - 0.003  |
| Same-sex marriage state    | 0.147***                      | 0.124 - 0.171   | 0.049***                       | 0.029 - 0.069   | -0.027***                | -0.044 - -0.011 |
| Age                        |                               |                 |                                |                 |                          |                 |
| 14 and younger             | Ref                           |                 | Ref                            |                 | Ref                      |                 |
| 15                         | <0.001                        | -0.007 - 0.006  | 0.007**                        | 0.001 - 0.013   | 0.011***                 | 0.008 - 0.013   |
| 16                         | 0.005                         | -0.003 - 0.012  | 0.012***                       | 0.006 - 0.018   | 0.006***                 | 0.003 - 0.009   |
| 17                         | 0.006                         | -0.001 - 0.014  | 0.018***                       | 0.012 - 0.024   | 0.005***                 | 0.003 - 0.008   |
| 18 and older               | 0.017***                      | 0.009 - 0.025   | 0.012***                       | 0.005 - 0.019   | -0.007***                | -0.011 - -0.003 |
| Race/ethnicity             |                               |                 |                                |                 |                          |                 |
| White                      | Ref                           |                 | Ref                            |                 | Ref                      |                 |
| Black                      | -0.165***                     | -0.173 - -0.157 | 0.044***                       | 0.038 - 0.050   | -0.023***                | -0.026 - -0.020 |
| Hispanic/Latino            | -0.078***                     | -0.088 - -0.069 | 0.035***                       | 0.029 - 0.041   | -0.031***                | -0.035 - -0.028 |
| Other race/ethnicity       | -0.047***                     | -0.058 - -0.036 | 0.009***                       | 0.002 - 0.015   | -0.022***                | -0.025 - -0.019 |
| Sex                        |                               |                 |                                |                 |                          |                 |
| Male                       | Ref                           |                 | Ref                            |                 | Ref                      |                 |
| Female                     | -0.013***                     | -0.017 - -0.009 | -0.016***                      | -0.019 - -0.012 | 0.031***                 | 0.029 - 0.033   |
| Unemployment rate          | 0.001                         | -0.003 - 0.004  | 0.003***                       | 0.001 - 0.006   | 0.001                    | <0.001 - 0.002  |
| Anti-discrimination policy | -0.010                        | -0.022 - 0.003  | -0.034***                      | -0.047 - -0.022 | -0.002                   | -0.007 - 0.004  |

Notes: Linear regression models include controls for state and year. Sample sizes differ based on variation in inclusion of outcome questions by state and year. \*<0.1, \*\*<0.05, \*\*\*<0.01
